# Supplementary material for: Dietary supplementation of black soldier fly (Hermetica illucens) meal modulates gut microbiota, innate immune response and health status of marron (Cherax cainii, Austin 2002) fed poultry-by-product and fishmeal based diets
Source: PeerJ. 2019 May 21;7:e6891. doi: 10.7717/peerj.6891 (PMC6534111; doi:10.7717/peerj.6891)
Supplement: Supplemental Information 2 — Dataset shows the growth performance of marron fed different protein sources. Abbreviations: WG, Weight Gain; SGR, Specific Growth Rate. Abbreviation: FM, Fish meal; PBM, Poultry-by-product meal; FM + BSF, Fish meal + Black soldier fly meal; PBM + BSF, Poultry-by-product meal + Black soldier fly meal. [file peerj-07-6891-s002.xlsx]

## Sheet: Growth
SL No	Tank	Feed	WT1	WT2		WG		SGR
1	A1	FM	63.9	92.2		28.3		0.611068
2	A1	FM	66.2	78.2		12		0.277649
3	A1	FM	63.8	86.5		22.7		0.507319
4	A2	FM	66.8	88.9		22.1		0.476348
5	A2	FM	67.9	89.3		21.4		0.456609
6	A2	FM	65.6	89.5		23.9		0.517772
7	A3	FM	75.4	104.3		28.9		0.540773
8	A3	FM	69.8	92.5		22.7		0.469291
9	A3	FM	70.4	98.7		28.3		0.563153
10	A4	FM	61.4	87.5		26.1		0.590382
11	A4	FM	65.7	93.2		27.5		0.582748
12	A4	FM	67.4	95.4		28		0.579056
					Final WG	24.325	Final SGR	0.514347
					STD	4.76867	STD	0.090442
					SE	1.3766	SE	0.0261084
1	B1	PBM	68.2	92.4		24.2		0.506137
2	B1	PBM	70.5	99.6		29.1		0.575916
3	B1	PBM	68.5	89.2		20.7		0.440079
4	B2	PBM	69.8	94.8		25		0.510226
5	B2	PBM	72.2	97.7		25.5		0.504103
6	B2	PBM	70.6	91.1		20.5		0.424879
7	B3	PBM	68.5	90.1		21.6		0.456811
8	B3	PBM	67.3	91.5		24.2		0.511965
9	B3	PBM	68.8	91.9		23.1		0.482495
10	B4	PBM	72.3	98.8		26.5		0.520456
11	B4	PBM	68.3	89.2		20.9		0.444952
12	B4	PBM	70.2	95.8		25.6		0.518191
					Final WG	23.9083	Final SGR	0.491351
					STD	2.65209	STD	0.0430145
					SE	0.765591	SE	0.0124172
					P-value	0.415518	P-value	0.256758
1	C1	FM+BSF	70.5	93.8		23.3		0.47592
2	C1	FM+BSF	69.5	92.5		23		0.47647
3	C1	FM+BSF	71.2	102.5		31.3		0.607283
4	C2	FM+BSF	68.8	91.9		23.1		0.482495
5	C2	FM+BSF	66.7	92.3		25.6		0.541399
6	C2	FM+BSF	72.8	102.6		29.8		0.57187
7	C3	FM+BSF	71.6	98.2		26.6		0.526519
8	C3	FM+BSF	70.5	97.3		26.8		0.536977
9	C3	FM+BSF	69.8	91.8		22		0.45663
10	C4	FM+BSF	68.8	91.3		22.5		0.471578
11	C4	FM+BSF	74.4	100.6		26.2		0.502827
12	C4	FM+BSF	67.2	91.2		24		0.508969
					Final WG	25.35	Final SGR	0.513245
					STD	2.94819	STD	0.0452983
					SE	0.851069	SE	0.0130765
					P-value	0.27186	P-value	0.485713
1	C2	PBM+BSF	72.2	95.8		23.6		0.471371
2	C2	PBM+BSF	68.6	91.5		22.9		0.480077
3	C2	PBM+BSF	70.1	95.5		25.4		0.515339
4	C3	PBM+BSF	69.5	94.9		25.4		0.519162
5	C3	PBM+BSF	69.2	97.3		28.1		0.567997
6	C3	PBM+BSF	70.1	102.6		32.5		0.634859
7	C3	PBM+BSF	68.5	95.2		26.7		0.548577
8	C4	PBM+BSF	69.1	97.3		28.2		0.570407
9	C4	PBM+BSF	70.5	92.8		22.3		0.458057
10	C4	PBM+BSF	71.1	98.3		27.2		0.539894
11	C4	PBM+BSF	72.1	101.6		29.5		0.571649
12	D1	PBM+BSF	70.1	96.2		26.1		0.527511
					Final WG	26.4917	Final SGR	0.533742
					STD	2.90093	STD	0.0500232
					SE	0.837426	SE	0.0144405
					P-value	0.0897457	P-value	0.258382
