# Supplementary material for: Dietary supplementation of black soldier fly (Hermetica illucens) meal modulates gut microbiota, innate immune response and health status of marron (Cherax cainii, Austin 2002) fed poultry-by-product and fishmeal based diets
Source: PeerJ. 2019 May 21;7:e6891. doi: 10.7717/peerj.6891 (PMC6534111; doi:10.7717/peerj.6891)
Supplement: Supplemental Information 3 — Dataset shows the health and immune indices of marron fed four different protein sources. Protein and fat in percentage, energy in mega joule (Mj) and lysozyme in unit/mL. Abbreviation: FM, Fish meal; PBM, Poultry-by-product meal; FM + BSF, Fish meal + Black soldier fly meal; PBM + BSF, Poultry-by-product meal + Black soldier fly meal. [file peerj-07-6891-s003.xlsx]

## Sheet: Sheet1
Date	Product	Label	Weight (g)	Weight (mg)	Sample Titration (ml)	Blank Titration (ml) Approx. 0.2 - 0.3	%N (9.58%)	%CP
2018-08-02	EDTA		0.5502	550.2	36.8	0.1	9.34509	58.4068
	C1		0.287	287	26.5	0.1	12.8872	80.5453
	C2		0.2717	271.7	25.7	0.1	13.2004	82.5028
	C3		0.2875	287.5	27.6	0.1	13.4009	83.7554
	C4		0.2796	279.6	26.5	0.1	13.2283	82.677					%CP = 14.01 x M x f x 100 x (mL HCL for titrant - mL HCL for BLANK) / Sample weight (mg)
							AVG	82.3701
							STDV	1.33677
							SE	0.668386
	PBM		0.2835	283.5	27.1	0.1	13.3429	83.3929
	PBM		0.2853	285.3	26.8	0.1	13.1114	81.946					Where	14.01 =	the atomic weight of N
	PBM		0.2981	298.1	28.9	0.1	13.5353	84.5958						M =	the molarity of the Hydrochloric Acid
	PBM		0.2982	298.2	28.3	0.1	13.2489	82.8056						f =	standard Kjeldahl factor (6.25)
							AVG	83.185
							STDV	1.11245
							SE	0.556224
							P-Value	0.174256
	FM+BSF		0.1306	130.6	12.8	0.1	13.6238	85.1488
	FM+BSF		0.1653	165.3	15.8	0.1	13.3065	83.1658
	FM+BSF		0.3	300	29.4	0.1	13.6831	85.5194
	FM+BSF		0.2973	297.3	30	0.1	14.0901	88.0632
							AVG	85.4743
							STDV	2.01158
							SE	1.00579
							P-Value	0.0351596
	PBM+BSF		0.2974	297.4	31.1	0.1	14.6036	91.2723
	PBM+BSF		0.297	297	30.9	0.1	14.5289	90.8056
	PBM+BSF		0.2968	296.8	29.8	0.1	14.0194	87.6215
	PBM+BSF		0.2988	298.8	30.1	0.1	14.0663	87.9142
							AVG	89.4034
							STDV	1.90191
							SE	0.950953
							P-Value	0.00987025

## Sheet: Sheet2
Energy calculation
Marron/Replicate	Feed	Energy (Mj)
1	FM	19821.8
2	FM	20182.4
3	FM	20053.2
4	FM	19983.7
	AVG	20010.3
	STD	150.221
	SE	75.1103
1	PBM	20132.9
2	PBM	20148.4
3	PBM	20508.5
4	PBM	20179.5
	AVG	20242.3
	STD	178.48
	SE	89.2398
	P-value	0.0552066
1	FM+BSF	22592.8
2	FM+BSF	21295.6
3	FM+BSF	21519.7
4	FM+BSF	21282.9
	AVG	21672.8
	STD	622.934
	SE	311.467
	P-value	0.010778
1	PBM+BSF	22689.8
2	PBM+BSF	21995.6
3	PBM+BSF	21129.7
4	PBM+BSF	21298.9
	AVG	21778.5
	STD	713.806
	SE	356.903
	P-value	0.0105614

## Sheet: Sheet3
Fat
Marron/Replicate	Feed	Fat
1	FM	8.8
2	FM	9.2
3	FM	8.7
4	FM	8.8
	AVG	8.875
	STD	0.221736
	SE	0.110868
1	PBM	8.5
2	PBM	8.1
3	PBM	8.6
4	PBM	8.4
	AVG	8.4
	STD	0.216025
	SE	0.108012
	P-value	0.0584414
1	FM+BSF	6.8
2	FM+BSF	5
3	FM+BSF	6.5
4	FM+BSF	7.1
	AVG	6.35
	STD	0.932738
	SE	0.466369
	P-value	0.0105718
1	PBM+BSF	6.2
2	PBM+BSF	5.1
3	PBM+BSF	6.1
4	PBM+BSF	6.9
	AVG	6.075
	STD	0.741058
	SE	0.370529
	P-value	0.00647539

## Sheet: Sheet4
Hepatopancreas index
Marron/Replicate	Feed	HI
1	FM	38.8
2	FM	37.6
3	FM	37.7
4	FM	39.8
	AVG	38.475
	STD	1.03722
	SE	0.518612
1	PBM	36.6
2	PBM	36.6
3	PBM	37.7
4	PBM	36.7
	AVG	36.9
	STD	0.535413
	SE	0.267706
	P-value	0.0515122
1	FM+BSF	35.2
2	FM+BSF	34.4
3	FM+BSF	34.7
4	FM+BSF	33.7
	AVG	34.5
	STD	0.627163
	SE	0.313581
	P-value	0.00583548
1	PBM+BSF	32.9
2	PBM+BSF	32.2
3	PBM+BSF	33.5
4	PBM+BSF	30.2
	AVG	32.2
	STD	1.43527
	SE	0.717635
	P-value	0.00625806

## Sheet: Sheet5
Lysozyme
Marron/Replicate	Feed	Lysozyme (u/mL)
1	FM	0.41
2	FM	0.41
3	FM	0.43
4	FM	0.43
	AVG	0.42
	STD	0.011547
	SE	0.0057735
1	PBM	0.4
2	PBM	0.41
3	PBM	0.4
4	PBM	0.4
	AVG	0.4025
	STD	0.005
	SE	0.0025
	P-value	0.050919
1	FM+BSF	0.49
2	FM+BSF	0.45
3	FM+BSF	0.44
4	FM+BSF	0.48
	AVG	0.465
	STD	0.0238048
	SE	0.0119024
	P-value	0.0262829
1	PBM+BSF	0.61
2	PBM+BSF	0.58
3	PBM+BSF	0.54
4	PBM+BSF	0.62
	AVG	0.5875
	STD	0.0359398
	SE	0.0179699
	P-value	0.00182557

## Sheet: Sheet6
Total haemocyte counts
Marron/Replicate	Feed	THC
1	FM	8.1
2	FM	7.8
3	FM	7.9
4	FM	8.2
	AVG	8
	STD	0.182574
	SE	0.0912871
1	PBM	8
2	PBM	7.9
3	PBM	8
4	PBM	7.6
	AVG	7.875
	STD	0.189297
	SE	0.0946485
	P-value	0.252129
1	FM+BSF	8.5
2	FM+BSF	7.9
3	FM+BSF	8.1
4	FM+BSF	8.3
	AVG	8.2
	STD	0.258199
	SE	0.129099
	P-value	0.0331378
1	PBM+BSF	9.1
2	PBM+BSF	9.6
3	PBM+BSF	9.8
4	PBM+BSF	9.4
	AVG	9.475
	STD	0.298608
	SE	0.149304
	P-value	0.00344108

## Sheet: Sheet7
Hemolymph Osmolality
Marron/Replicate	Feed	HO
1	FM	0.4
2	FM	0.4
3	FM	0.39
4	FM	0.4
	AVG	0.3975
	STD	0.005
	SE	0.0025
1	PBM	0.4
2	PBM	0.42
3	PBM	0.4
4	PBM	0.4
	AVG	0.405
	STD	0.01
	SE	0.005
	P-value	0.107585
1	FM+BSF	0.4
2	FM+BSF	0.41
3	FM+BSF	0.42
4	FM+BSF	0.45
	AVG	0.42
	STD	0.0216025
	SE	0.0108012
	P-value	0.0677083
1	PBM+BSF	0.48
2	PBM+BSF	0.45
3	PBM+BSF	0.43
4	PBM+BSF	0.45
	AVG	0.4525
	STD	0.0206155
	SE	0.0103078
	P-value	0.00394892
